# Supplementary material for: Design of a graphene nitrene two-dimensional catalyst providing a well-defined site accommodating up to three metals, with application to N2 reduction electrocatalysis
Source: Royal Society of Chemistry journal article supplement (doi:10.1039/d0cc03723k), 2020-01-01
Supplement: d0cc03723k1.pdf [file d0cc03723k1.pdf]

# Design of a Graphene Nitrene Two-Dimensional Catalyst Providing a Well-Defined Site Accommodating Up to Three Metals, with Application to N<sub>2</sub> Reduction Electrocatalysis

*KEYWORDS* : Metal cluster catalysts(MCC), dope, nitrogen reduction, DFT

Li Li, and Lai Xu\*

Institute of Functional Nano & Soft Materials (FUNSOM), Jiangsu Key Laboratory for Carbon-Based Functional Materials & Devices, Soochow University, Suzhou, 215123, China

Email: xulai15@suda.edu.cn; ORCID: orcid.org/0000-0003-2473-3359;

## Computational Methods

Spin polarized density functional theory calculations were performed by using Vienna Ab Initio Simulation Package (VASP),<sup>1</sup> and the interaction of ions and electrons was described by the projector enhanced wave (PAW) method.<sup>2</sup> The exchange correlation between electrons is described by the generalized gradient approximation (GGA) in the form of a Perdew-Burke-Ernzerhof (PBE) function.<sup>3</sup> The energy cutoff for the plane-wave basis expansion was set to 450 eV. The Brillouin area of the inverted space was sampled by a method centered on the Gamma point. This scheme has a 4×4×1 k and 8×8×1 k point grid for the calculation of structural optimization and electronic properties respectively. The vacuum layer is set to 15 Å, the force on each atom is less than 0.05 eV Å<sup>-1</sup>. We used the DFT-D3 method for vdW correction.<sup>4</sup> Bader charge calculation was applied to evaluate the charge transfer in different systems.<sup>5</sup>

The adsorption energy ( $E_{\text{ads}}$ ) of N<sub>2</sub> on the catalyst is defined as

$$E_{\text{ads}} = E_{\text{N}_2\text{-cat}} - E_{\text{N}_2} - E_{\text{cat}} \quad (1)$$

where  $E_{\text{N}_2\text{-cat}}$ ,  $E_{\text{N}_2}$  and  $E_{\text{cat}}$  respectively represents the total energy of N<sub>2</sub> adsorbed on the catalyst surface, energy of N<sub>2</sub> alone and energy of catalyst alone. Based on this definition, a negative value of  $E_{\text{ads}}$  shows that the adsorption is exothermic.

We used the computational hydrogen electrode (CHE) method<sup>6</sup> to calculate Gibbs free energy of the reaction for NRR. The free energy of the NRR step is defined as

$$\Delta G = \Delta E + \Delta E_{\text{ZPE}} - T\Delta S \quad (2)$$

where  $\Delta E$  is the energy difference of DFT,  $\Delta E_{ZPE}$  and  $T\Delta S$  are the change in zero energy and the change in entropy at 298.15 K, which is obtained by calculating the vibrational frequency. The catalytic activity is described by limiting potential ( $U_{limiting}$ ), it is obtained using the equation:  $U_{limiting} = -\Delta G_{max}/e$ .

### Additional Figures

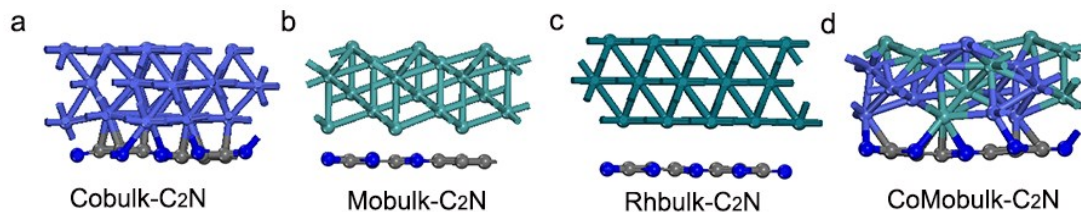

Figure S1. The optimized combination systems of metal bulk on the top of C<sub>2</sub>N, (a-d) represent Cobulk-C<sub>2</sub>N, Mobulk-C<sub>2</sub>N, Rhbulk-C<sub>2</sub>N and CoMobulk-C<sub>2</sub>N.

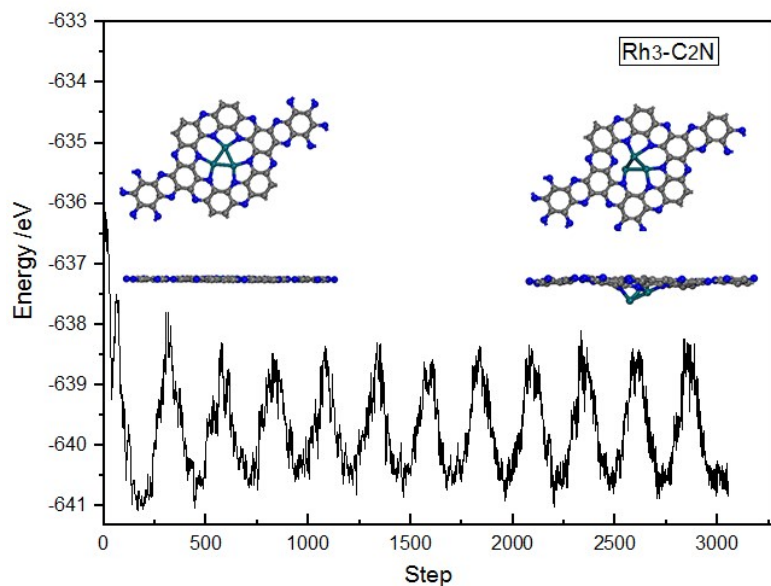

Figure S2. The ab initio molecular dynamics (AIMD) of Rh<sub>3</sub>-C<sub>2</sub>N. Total time is 9 ps, temperature is 300 K. the time step is 3 fs, the NVT ensemble was selected.

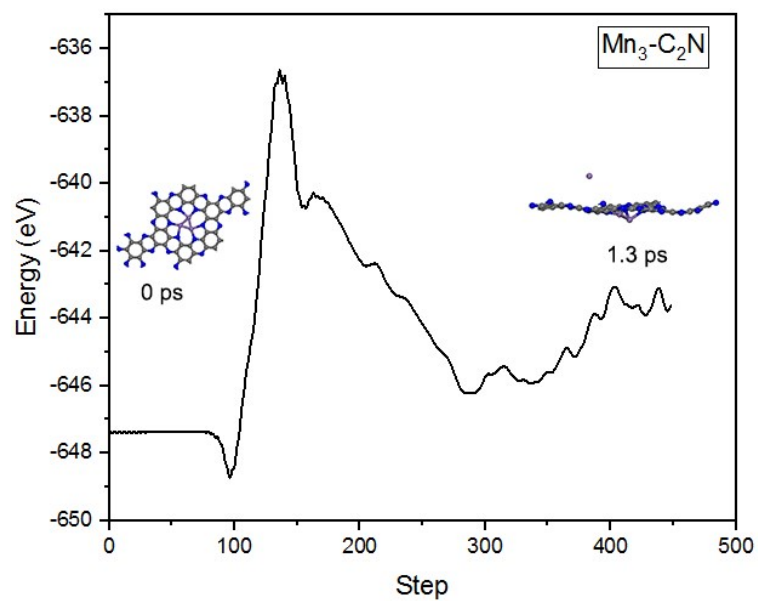

Figure S3. The ab initio molecular dynamics (AIMD) of Mn<sub>3</sub>-C<sub>2</sub>N. Total time is 1.3 ps, temperature is 300 K. TM cluster are destroyed, one metal atom stays away from C<sub>2</sub>N substrate.

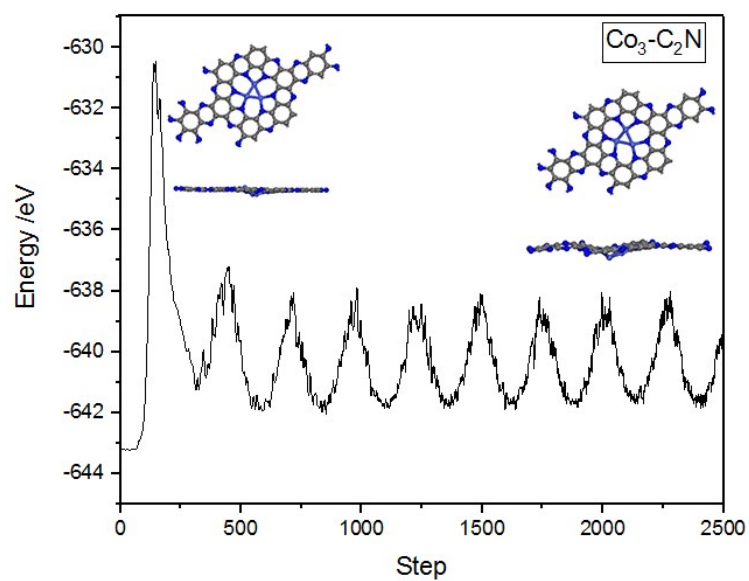

Figure S4. The ab initio molecular dynamics (AIMD) of Co<sub>3</sub>-C<sub>2</sub>N. Total time is 7.5ps. Temperature is 300 K.

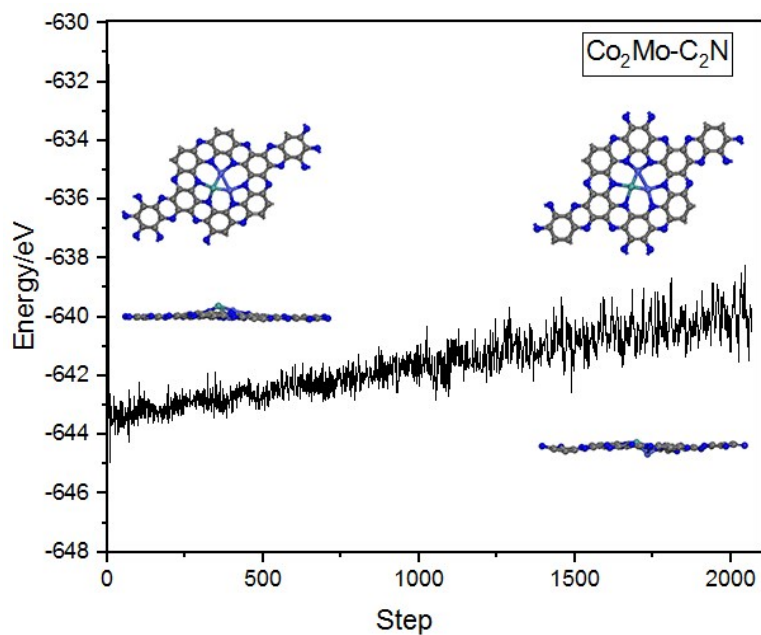

Figure S5. The ab initio molecular dynamics (AIMD) of  $\text{Co}_2\text{Mo-C}_2\text{N}$ . Total time is 6 ps. Temperature increases from 300 K to 1000 K.

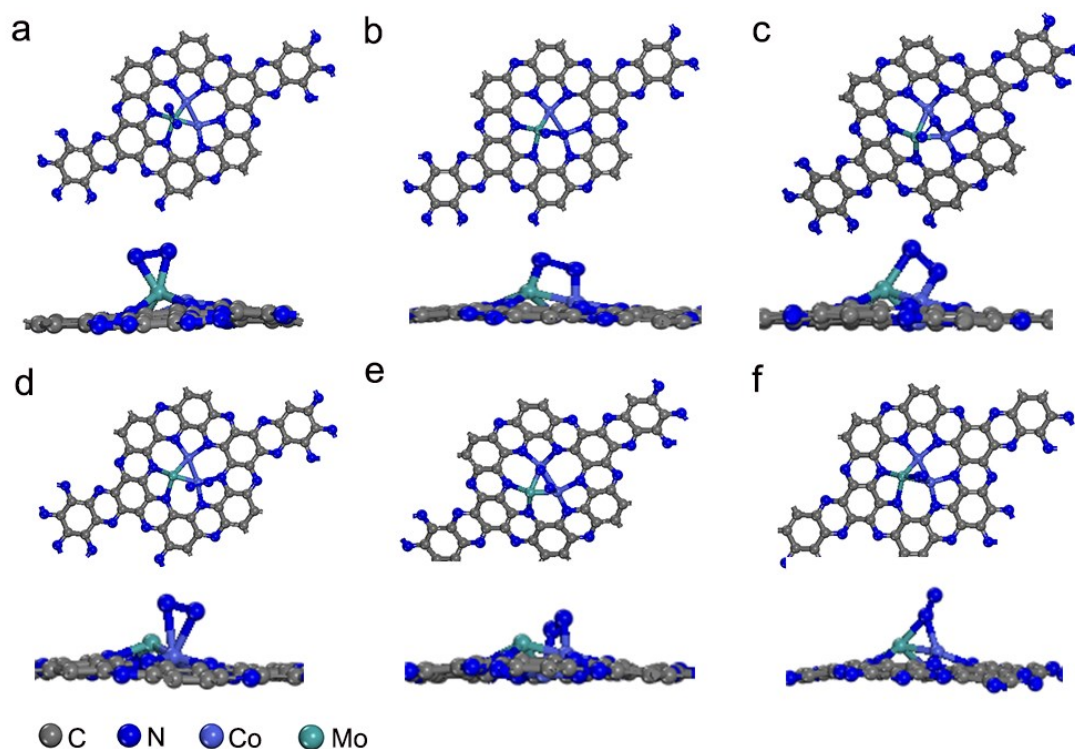

Figure S6. Possible adsorption configuration of  $\text{N}_2$  molecules adsorbed on  $\text{Co}_2\text{Mo-C}_2\text{N}$  system.

We consider six adsorption modes of  $\text{N}_2$ . They are (a)  $\text{N}_2$  parallel adsorption on Mo atoms; (b)  $\text{N}_2$  parallel adsorption between Mo and Co atoms; (c)  $\text{N}_2$  is bridged between Mo and bimetal Co, such as the position of the midline of the bottom edge of an isosceles triangle; (d)  $\text{N}_2$  is adsorbed in parallel on Co atoms; (e) in parallel on two Co atoms; (f) vertical adsorption between Mo and Co atoms. It can be seen that  $\text{N}_2$

molecules adsorbed on metal clusters are unlikely to dissociate directly into two isolated nitrogen atoms. The  $N_2$  adsorption energy of these systems with different adsorption modes was calculated. The range of the adsorption energy is from -0.67 eV (a) to -1.22 eV (f) (see table S1 for details). Notably, after the optimization, the adsorption site of  $N_2$  changes (Figure S6c),  $N_2$  is adsorbed between Mo and Co metal atoms, and the structure is the same as Figure S6b. The adsorption energy of  $N_2$  parallel (b), and vertical configurations between Mo and Co atoms (f) is larger, so we will focus on the reduction reaction process based on the correlation mechanism initiated by these two adsorption configurations.

Table S1. The adsorption energies of various  $N_2$  configurations.

| Configuration | a     | b     | c     | d     | e     | f     |
|---------------|-------|-------|-------|-------|-------|-------|
| Eads (eV)     | -0.67 | -1.17 | -1.20 | -0.91 | -0.79 | -1.22 |

Table S2. The  $\Delta G(N_2H)$ ,  $\Delta G(N_2)$  and  $\Delta G(H)$  of single atom catalysts (SACs), double atom catalysts (DAC) and metal cluster catalysts (MCCs).

| TM(1~3)-C <sub>2</sub> N | $\Delta G(N_2)/eV$  | $\Delta G(H)/eV$ | $\Delta G(N_2H)/eV$ |
|--------------------------|---------------------|------------------|---------------------|
| V <sub>1</sub>           | -0.59               | -1.06            | 0.87                |
| V <sub>2</sub>           | -1.54               | -2.23            | -0.11               |
| V <sub>3</sub>           | -0.98               | -0.25            | 0.60                |
| Mn <sub>1</sub>          | -0.28               | 0.32             | 1.18                |
| Mn <sub>2</sub>          | -0.72               | -0.36            | 0.50                |
| Mn <sub>3</sub>          | -3.69               | -3.40            | 0.34                |
| Fe <sub>1</sub>          | -0.07               | 0.72             | 0.71                |
| Fe <sub>2</sub>          | -0.55               | -0.52            | 0.30                |
| Fe <sub>3</sub>          | -0.81               | -1.02            | 0.71                |
| Co <sub>1</sub>          | -0.84               | 0.27             | 1.30                |
| Co <sub>2</sub>          | -0.87               | -0.50            | 0.80                |
| Co <sub>3</sub>          | -1.14               | -1.10            | 0.18                |
| Ni <sub>1</sub>          | -0.49               | 0.55             | 1.25                |
| Ni <sub>2</sub>          | -0.71               | -0.47            | 0.40                |
| Ni <sub>3</sub>          | -1.30               | -1.37            | 0.67                |
| Cu <sub>1</sub>          | -0.59               | 0.61             | 1.82                |
| Cu <sub>2</sub>          | -0.85               | -1.02            | 0.74                |
| Cu <sub>3</sub>          | -0.04               | -2.18            | 0.52                |
| Mo <sub>1</sub>          | -1.47               | -1.24            | 0.43                |
| Mo <sub>2</sub>          | No $N_2$ adsorption | /                | /                   |
| Mo <sub>3</sub>          | -1.39               | -0.70            | 0.63                |
| Ru <sub>1</sub>          | -0.81               | -0.49            | 0.89                |
| Ru <sub>2</sub>          | -0.48               | -0.22            | 1.25                |
| Ru <sub>3</sub>          | -1.40               | -0.63            | 1.06                |
| Rh <sub>1</sub>          | -0.49               | 0.22             | 1.34                |
| Rh <sub>2</sub>          | -0.50               | -0.45            | 1.16                |
| Rh <sub>3</sub>          | -5.73               | -4.96            | 0.31                |

|                    |                              |       |      |
|--------------------|------------------------------|-------|------|
| Pt <sub>1</sub>    | No N <sub>2</sub> adsorption | /     | /    |
| Pt <sub>2</sub>    | -1.35                        | -2.05 | 1.34 |
| Pt <sub>3</sub>    | -1.35                        | -0.44 | 1.07 |
| CoMo               | -1.00                        | -0.39 | 0.60 |
| Co <sub>2</sub> Mo | -1.01                        | -0.83 | 0.45 |
| CoMo <sub>2</sub>  | -0.73                        | -0.19 | 0.68 |

Table S3. The  $\Delta G(N_2H)$  of TMbulk-C<sub>2</sub>N, TMbulk=CoMo bulk, Rh bulk.

|                         |         |           |
|-------------------------|---------|-----------|
| TMbulk-C <sub>2</sub> N | Rh bulk | CoMo bulk |
| $\Delta G(N_2H)/eV$     | 1.10    | 1.11      |

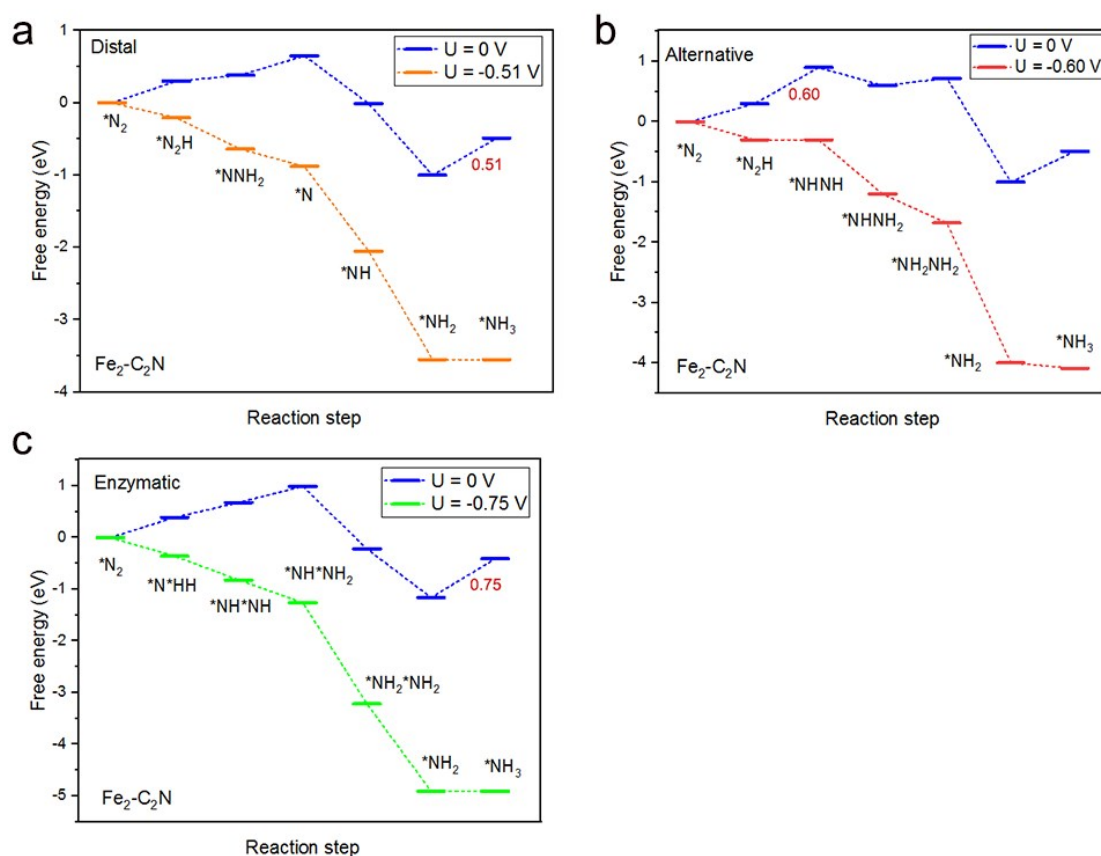

Figure S7. Gibbs free energy diagrams for NRR on Fe<sub>2</sub>-C<sub>2</sub>N along distal pathway, alternating pathway and enzymatic pathway.

We considered the competitive reaction and  $\Delta G(N_2H)$  of the corresponding single-diatomic and diatomic systems. The  $\Delta G(N_2)$  of the Fe<sub>1</sub>-C<sub>2</sub>N system is very small ( $\Delta G(N_2) = -0.07$  eV), indicating that its adsorption capacity for N<sub>2</sub> is very poor, and the value of  $\Delta G(N_2H)$  is large (0.71 eV). The catalytic activity of Fe<sub>1</sub>-C<sub>2</sub>N system is low. Although Fe<sub>3</sub>-C<sub>2</sub>N has a better adsorption effect for N<sub>2</sub>, its ability to adsorb H is stronger, so the hydrogen evolution reaction tends to occur. The value of  $\Delta G(N_2H)$  is 0.71 eV, indicating that the NRR catalytic ability is weak, Fe<sub>2</sub>-C<sub>2</sub>N system has a strong ability to adsorb N<sub>2</sub> ( $\Delta G(N_2) = -0.55$  eV) better than H ( $\Delta G(H) = -0.52$  eV), and the first step reaction is easy to occur ( $\Delta G(N_2H) = 0.30$  eV), so it is a

promising diatomic catalyst (Table S2). Three reaction pathways of the system are calculated (Figure S7), of which the limiting potential of the distal pathways is -0.51 eV versus RHE(Figure S7a), which is the optimal path for the reduction reaction.

#### Distal

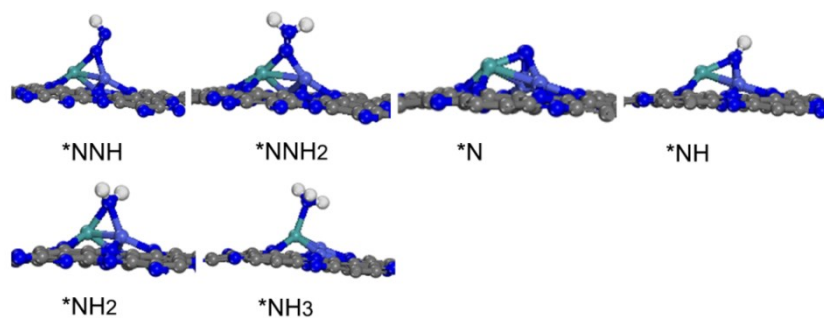

#### Alternative

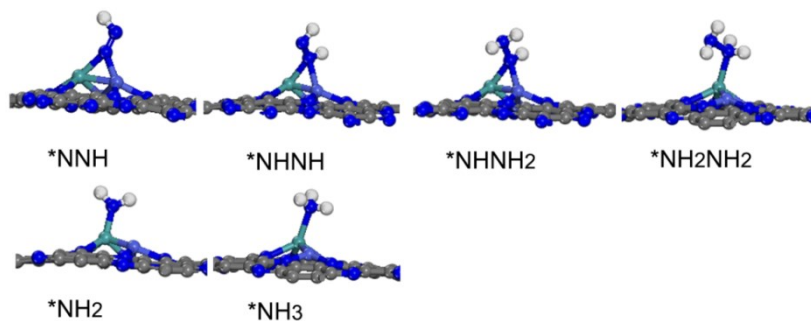

#### Enzymatic

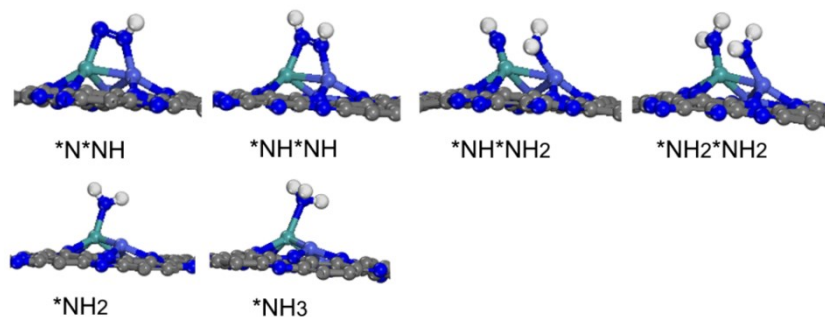

Figure S8. Intermediate structures of Co<sub>2</sub>Mo-C<sub>2</sub>N system in the three pathways.

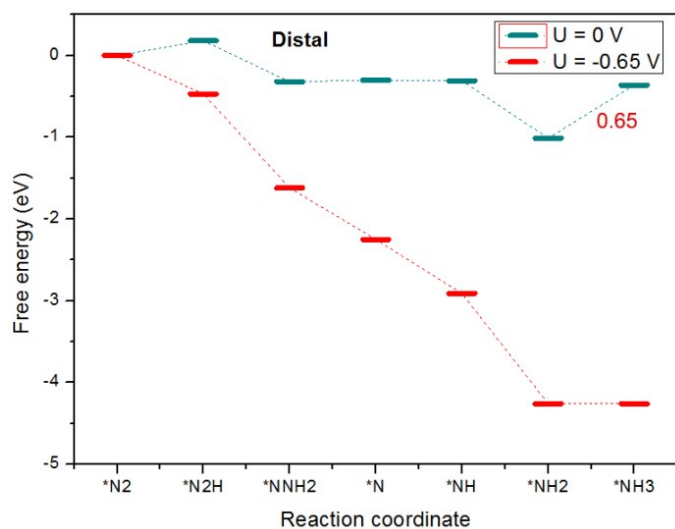

Figure S9. Gibbs free energy diagrams for NRR on  $\text{Co}_3\text{-C}_2\text{N}$  along distal pathway.

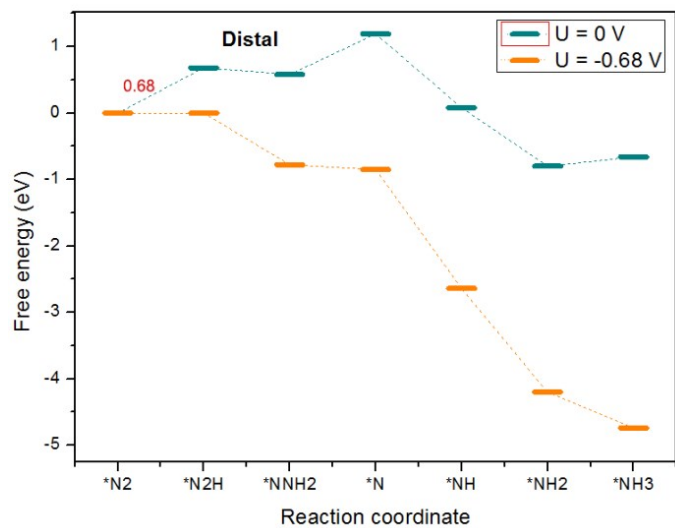

Figure S10. Gibbs free energy diagrams for NRR on  $\text{CoMo}_2\text{-C}_2\text{N}$  along distal pathway.



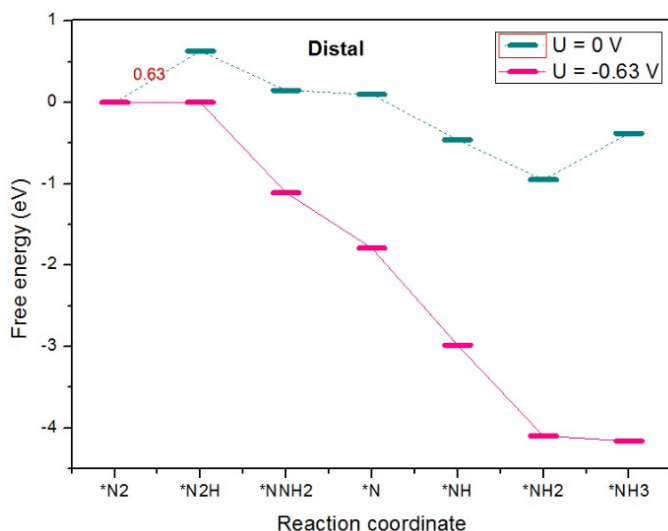

Figure S11. Gibbs free energy diagrams for NRR on Mo<sub>3</sub>-C<sub>2</sub>N along distal pathway.

In addition, we also compared the NRR reaction pathway of the Co<sub>3</sub>-C<sub>2</sub>N, Mo<sub>3</sub>-C<sub>2</sub>N, CoMo<sub>2</sub>-C<sub>2</sub>N and CoMo bulk-C<sub>2</sub>N system, such as the distal pathway. Specifically, the maximum Gibbs free energy increase of N<sub>2</sub> catalyzed by the Co cluster catalyst is 0.65 eV, and the RDS step is NH<sub>2</sub> reduction to NH<sub>3</sub>. In one step, the  $\Delta G_{\text{max}}$  of the Mo cluster catalyst is 0.63 eV, and the RDS step is the first step (formation of N<sub>2</sub>H). For CoMo<sub>2</sub>-C<sub>2</sub>N system, limiting potential ( $U_L$ ) is -0.68 V versus RHE is required to form N<sub>2</sub>H. For CoMo-C<sub>2</sub>N and CoMo bulk-C<sub>2</sub>N systems,  $\Delta G$  (N<sub>2</sub>H) are 0.60 eV and 1.11 eV separately (Table S2, S3), which are larger than that of Co<sub>2</sub>Mo-C<sub>2</sub>N. Therefore, we found that a cluster catalyst with one Co atom and two Mo atoms has the best catalytic effect (Figure S9, S10, S11, Table S3).

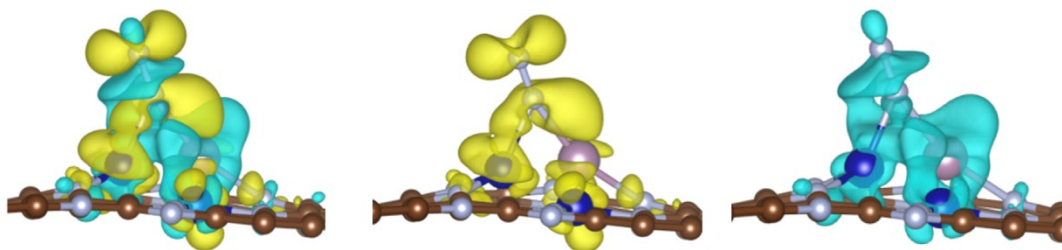

Figure S12. Differential charge of N<sub>2</sub> adsorbed on Co<sub>2</sub>Mo-C<sub>2</sub>N, yellow represents obtaining charges, blue represents losing charges.

Figure S12 is a differential charge diagram for the Co<sub>2</sub>Mo-C<sub>2</sub>N structure. Charge flow analysis shows that the charge transfer between the metals and adsorbed N<sub>2</sub> is bidirectional, the empty d orbitals of the metals accept the lone pair electrons from N<sub>2</sub>, the occupied d orbitals of the metal provides electrons to the  $\pi^*$  orbitals of N<sub>2</sub>, and promotes the breaking of the NN triple bond. The combination of the metal's empty orbit and occupied d orbit plays a key role in the adsorption of N<sub>2</sub>.

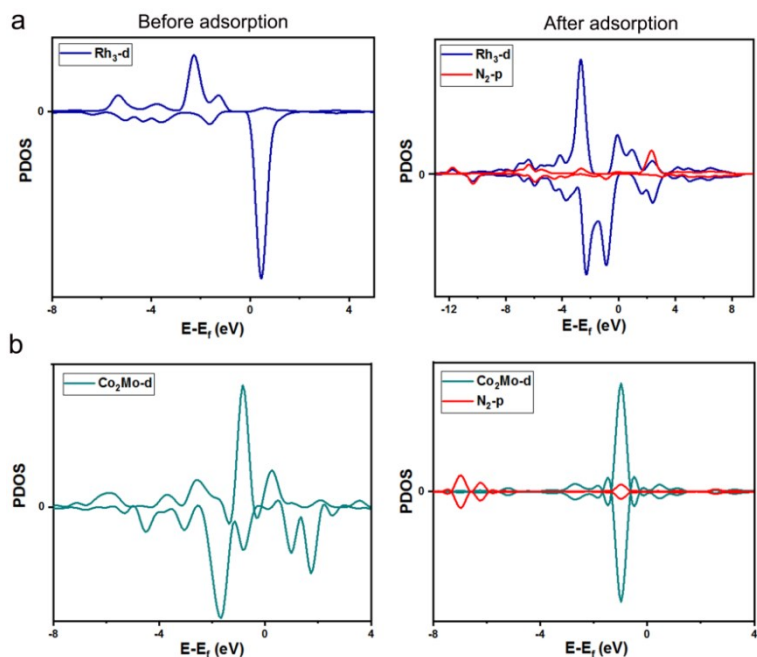

Figure S13. (a, b) PDOS before and after adsorption of N<sub>2</sub> on Rh<sub>3</sub>-C<sub>2</sub>N and Co<sub>2</sub>Mo-C<sub>2</sub>N. The Fermi level was set to be zero.

Figure S13a, S13b show a wide overlap between the d orbitals of the metal atoms (Rh<sub>3</sub>, Co<sub>2</sub>Mo) and the sp orbital of N<sub>2</sub>, for after adsorption of N<sub>2</sub> on Rh<sub>3</sub>-C<sub>2</sub>N, there was a clear overlap on a peak near -4~0 eV, for after adsorption of N<sub>2</sub> on Co<sub>2</sub>Mo-C<sub>2</sub>N, there was a clear overlap on a peak near -1 eV, indicating that there were a strong hybridization between the TM orbitals and N<sub>2</sub> orbitals in this state.

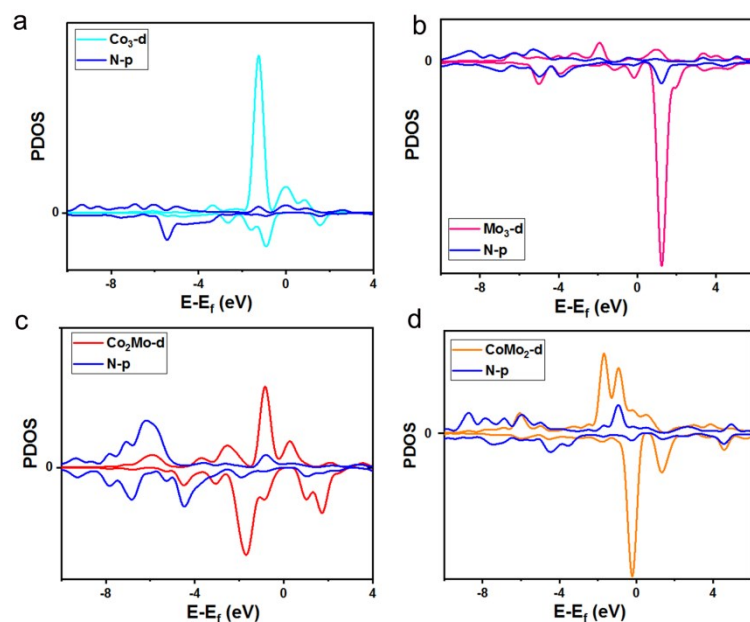

Figure S14. (a, b, c, d) Projected density of states (PDOS) of Co<sub>3</sub>-C<sub>2</sub>N, Mo<sub>3</sub>-C<sub>2</sub>N, Co<sub>2</sub>Mo-C<sub>2</sub>N and CoMo<sub>2</sub>-C<sub>2</sub>N.

The partial density of states (PDOS) of MCCs indicates that the electronic interaction mainly exists between  $TM_3-d$  and N (from  $C_2N$ )-2p orbitals, The valence electrons of metal clusters saturate the semi-full orbitals of N in  $C_2N$  (Figure S14a, S14b, S14c, S14d).

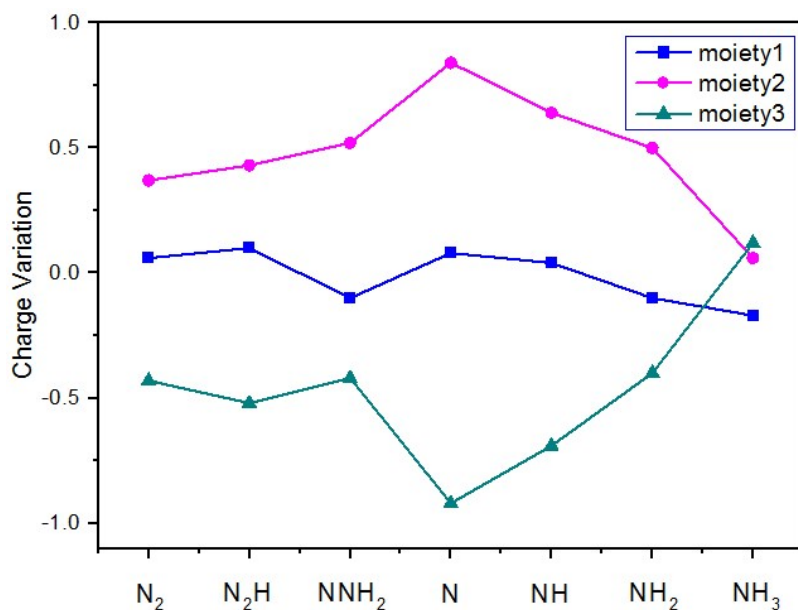

Figure S15. Charge variation of the three moieties for  $Co_2Mo-C_2N$ . Moiety 1 represents the CN substrate, Moiety 2 represents the 6 nitrogen atoms ( $Co_2MoN_6$ ) adjacent to the metal, and Moiety 3 represents the adsorption species ( $N_xH_y$ ).

In order to better illustrate the catalytic properties, the Bader charge as shown in Figure S13 was calculated and analyzed. Group 1 represents the CN substrate, group 2 represents the 6 nitrogen atoms ( $Co_2MoN_6$ ) adjacent to the metal, and group 3 represents the adsorption species ( $N_xH_y$ ). The nitrogen adsorption approach is vertical adsorption. The pathway to generate  $NH_3$  is a distal mechanism. In the first step of adsorption of  $N_2$ , the CN and  $Co_2MoN_6$  parts lost 0.06 and 0.37 electrons, respectively. During the subsequent reduction step, significant charge fluctuations occurred in both parts. After the first  $NH_3$  was formed, the CN substrate lost 0.08 electrons,  $Co_2MoN_6$  lost 0.84 electrons, and  $*N$  gained 0.92 electrons. When the second  $NH_3$  was formed,  $NH_3$  transferred 0.12 electrons back to the CN monolayer. In the entire reaction pathway, the charge on the CN substrate hardly changes.  $Co_2MoN_6$  acts as the activation center, transferring most of the electrons to the adsorbed species, thereby activating the intermediate and continuing the subsequent reactions.

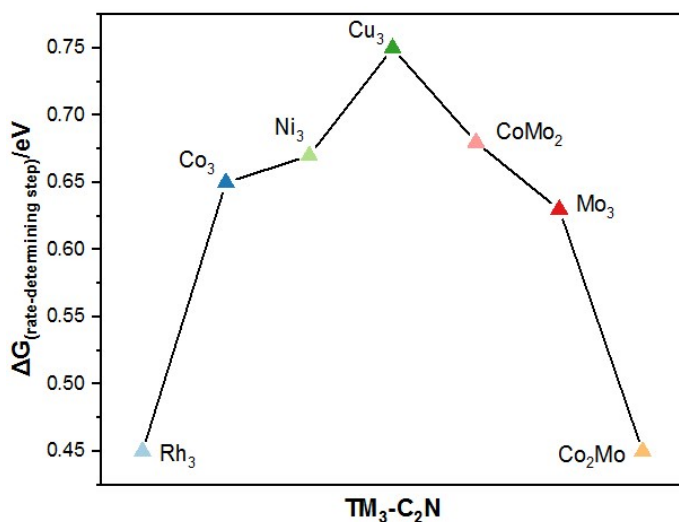

Figure S16. Relationship diagram between the activity and free energy of model catalysts.

## References:

1. Kresse, G.; Furthmüller, J., Efficiency of ab-initio total energy calculations for metals and semiconductors using a plane-wave basis set. *Computational Materials Science* **1996**, *6* (1), 15-50.
2. Kresse, G.; Joubert, D., From ultrasoft pseudopotentials to the projector augmented-wave method. *Physical Review B* **1999**, *59* (3), 1758.
3. Perdew, J. P.; Burke, K.; Ernzerhof, M., Generalized gradient approximation made simple. *Physical Review Letters* **1996**, *77* (18), 3865.
4. Grimme, S.; Antony, J.; Ehrlich, S.; Krieg, H., A consistent and accurate ab initio parametrization of density functional dispersion correction (DFT-D) for the 94 elements H-Pu. *The Journal of Chemical Physics* **2010**, *132* (15), 154104.
5. Henkelman, G.; Arnaldsson, A.; Jónsson, H., A fast and robust algorithm for Bader decomposition of charge density. *Computational Materials Science* **2006**, *36* (3), 354-360.
6. Norskov, J. K.; Rossmeisl, J.; Logadottir, A.; Lindqvist, L.; Kitchin, J. R.; Bligaard, T.; Jónsson, H., Origin of the overpotential for oxygen reduction at a fuel-cell cathode. *J. Phys. Chem. B* **2004**, *108* (46), 17886-17892.
